# Supplementary material
Source: Springer Nature journal article supplement (https://www.springermedizin.de/resource/supplementary/12885_2013_3985_MOESM1_ESM.pdf/9464964)
Supplement: MOESM1 [file 9464964]

Of patients diagnosed as primary pulmonary carcinoma between January 2003 and June 2010, EGFR mutation analysis was performed on 424 patients from April 2008 to June 2010 at our institution.

51 patients were diagnosed as non-adenocarcinoma  
65 patients had best supportive care  
2 patients had died within one month  
19 patients were staged at clinical IIIA  
3 patients had unknown EGFR mutation status

284 advanced pulmonary adenocarcinoma patients received initial therapy

163 advanced pulmonary adenocarcinoma patients harboring wild-type EGFR

121 advanced pulmonary adenocarcinoma patients harboring activating EGFR mutations
